# Supplementary material
Source: publisher site journal article supplement (https://www.dovepress.com/article/268006)
Supplement: Supplementary file 1 [file get_supplementary_file.php]

### Supplementary file: Comparison of service utilisation between HICS and UCS

Figure S1 IP utilisation rates between the Health Insurance Card Scheme (HICS) and the Universal Coverage Scheme (UCS) beneficiaries by years.

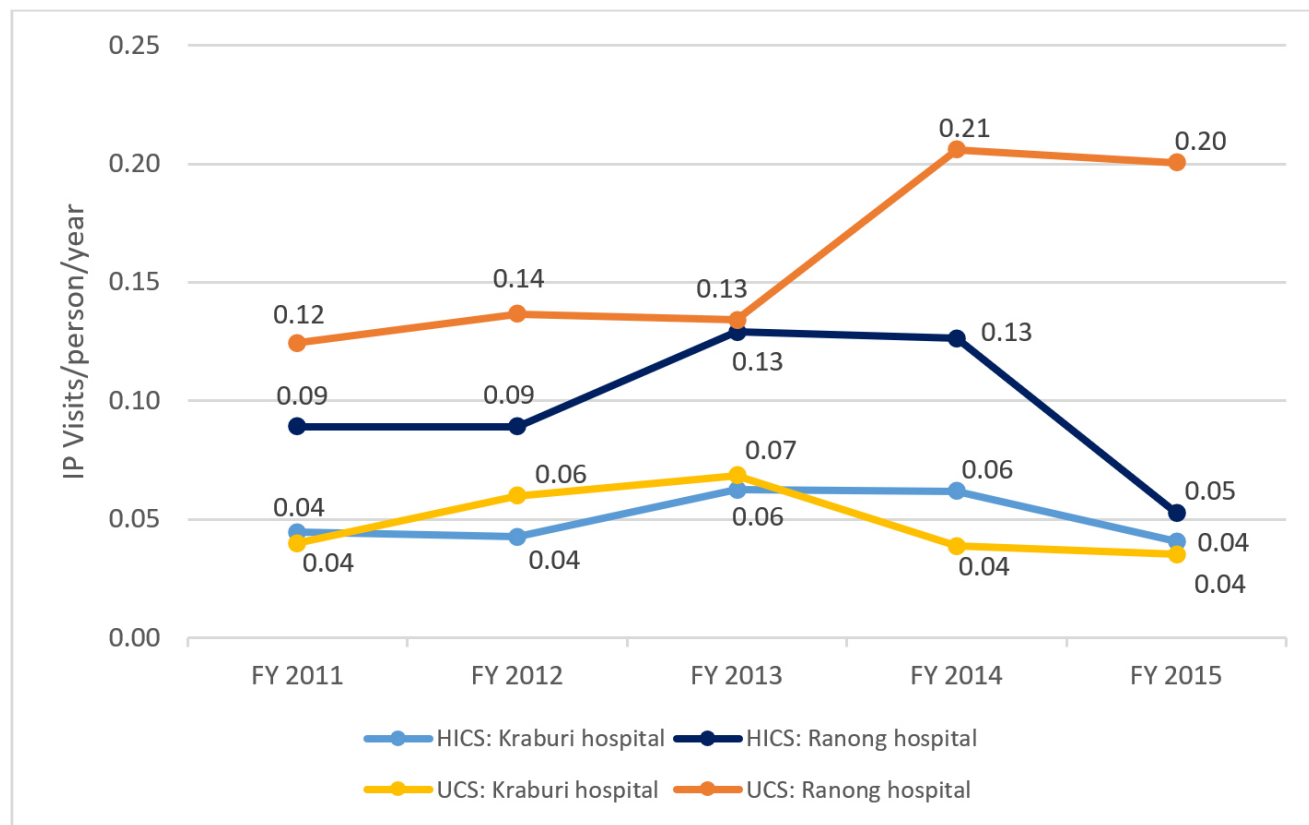

Figure S2 OP utilisation rate between the HICS and the UCS beneficiaries by years.

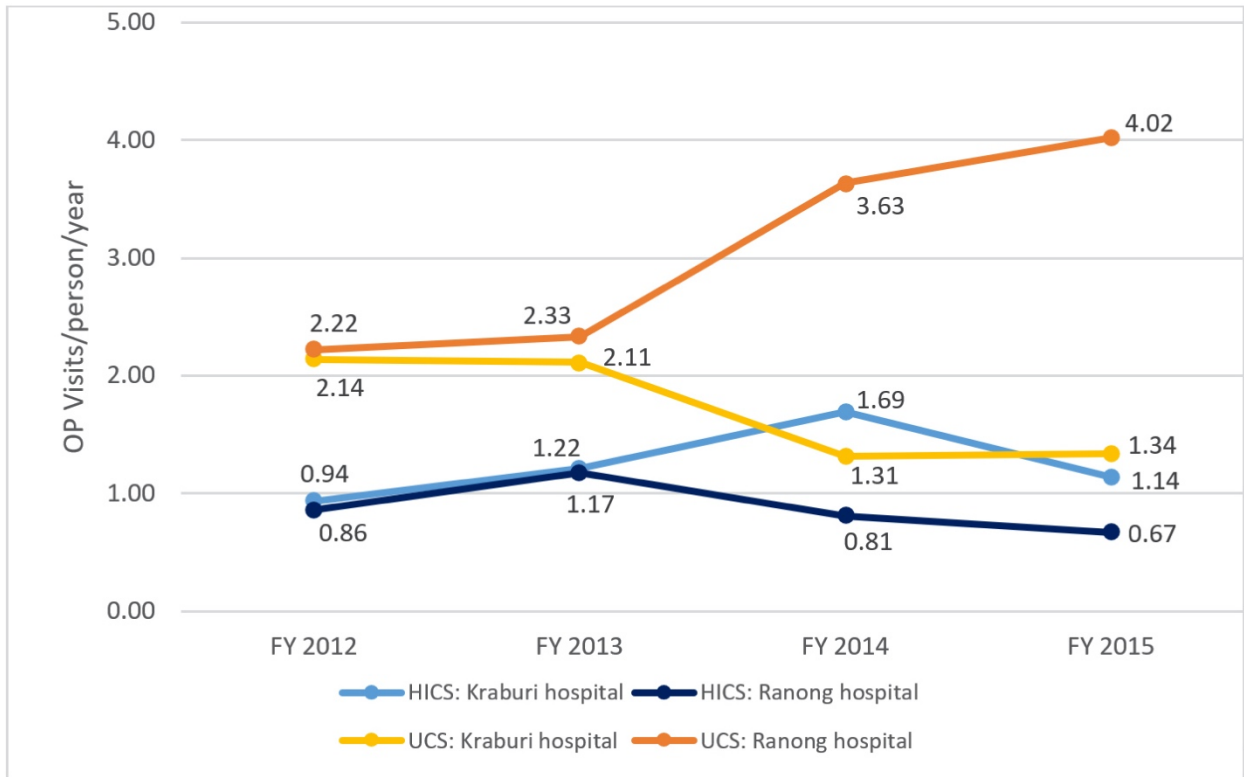

Note: The utilisation rate at the health centre level cannot be analysed due to a lack of an accumulated number of registered migrants at subdistrict level.
